# Supplementary material
Source: HighWire-hosted journal article supplement (https://www.cmajopen.ca/highwire/filestream/88834/field_highwire_adjunct_files/0/open-2021-0140-1-at.pdf)
Supplement: open-2021-0140-1-at.pdf [file open-2021-0140-1-at.pdf]

**Supplemental Table 1. Summary of evidence and guidelines regarding radiograph use for common pediatric conditions**

| Condition     | Practice guideline / Evidence                                         | Recommendation                                                                                                                                                                                                                                                                                                                                                                                                                                              |
|---------------|-----------------------------------------------------------------------|-------------------------------------------------------------------------------------------------------------------------------------------------------------------------------------------------------------------------------------------------------------------------------------------------------------------------------------------------------------------------------------------------------------------------------------------------------------|
| Bronchiolitis | Canadian Pediatric Society <sup>1</sup>                               | Bronchiolitis is a clinical diagnosis based on history and physical examination. Diagnostic studies, including chest radiograph, blood tests, and viral or bacterial cultures, are not recommended in typical cases.                                                                                                                                                                                                                                        |
|               | American Academy of Pediatrics <sup>2</sup>                           | When clinicians diagnose bronchiolitis on the basis of history and physical examination, radiographic or laboratory studies should not be obtained routinely.                                                                                                                                                                                                                                                                                               |
|               | National Institute for Health and Care Excellence <sup>3</sup>        | Do not routinely perform a chest X-ray in babies or children with bronchiolitis, because changes on X-ray may mimic pneumonia and should not be used to determine the need for antibiotics.                                                                                                                                                                                                                                                                 |
|               | Australasian Bronchiolitis Guidelines <sup>4</sup>                    | Routine chest x ray is not recommended as it does not improve management in infants presenting with bronchiolitis and may lead to treatments of no benefit.                                                                                                                                                                                                                                                                                                 |
|               | Choosing Wisely – Pediatric Hospital Medicine <sup>5</sup>            | Do not order chest radiographs in children with asthma or bronchiolitis.                                                                                                                                                                                                                                                                                                                                                                                    |
|               | Choosing Wisely Australia <sup>6</sup>                                | Do not routinely undertake chest X-rays for the diagnosis of bronchiolitis in children or routinely prescribe salbutamol or systemic corticosteroids to treat bronchiolitis in children                                                                                                                                                                                                                                                                     |
|               | Friedman, BMJ 2021 <sup>7</sup>                                       | Avoid doing chest x-rays in infants with typical bronchiolitis                                                                                                                                                                                                                                                                                                                                                                                              |
| Asthma        | Canadian Pediatric Society and Canadian Thoracic Society <sup>8</sup> | Ancillary tests are not routinely recommended. Chest x-rays are rarely indicated for typical asthma exacerbations but may be useful to exclude complications (...) in patients with significant chest pain, hypoxemia, prolonged fever, or persisting asymmetry, or when a patient has failed to improve with maximal conventional treatment. In the absence of suggestive clinical features, chest x-rays increase the risk of overdiagnosis of pneumonia. |
|               | National Heart Lung and Blood Institute <sup>9</sup>                  | Chest radiography is not recommended for routine assessment but should be obtained for patients suspected of a complicating cardiopulmonary process, such as congestive heart failure, or another pulmonary process such as pneumothorax, pneumomediastinum, pneumonia, or lobar atelectasis.                                                                                                                                                               |
|               | Global Initiative for Asthma <sup>10</sup>                            | Radiographs are rarely indicated; however, if there is doubt about the diagnosis of asthma in a wheezing or coughing child, a plain chest x-ray may help to exclude                                                                                                                                                                                                                                                                                         |

|                |                                                                                               |                                                                                                                                                                                                                                                                                                                        |
|----------------|-----------------------------------------------------------------------------------------------|------------------------------------------------------------------------------------------------------------------------------------------------------------------------------------------------------------------------------------------------------------------------------------------------------------------------|
|                |                                                                                               | structural abnormalities (e.g. congenital lobar emphysema, vascular ring), chronic infections such as tuberculosis, an inhaled foreign body, or other diagnoses.                                                                                                                                                       |
|                | Choosing Wisely – Pediatric Hospital Medicine <sup>5</sup>                                    | Do not order chest radiographs in children with asthma or bronchiolitis.                                                                                                                                                                                                                                               |
|                | Choosing Wisely Australia <sup>6</sup>                                                        | Do not routinely order chest X-rays for the diagnosis of asthma in children.                                                                                                                                                                                                                                           |
| Abdominal pain | Choosing Wisely Australia <sup>6</sup>                                                        | Do not routinely order abdominal X-rays for the diagnosis of non-specific abdominal pain in children                                                                                                                                                                                                                   |
|                | Kellow, Radiology 2008 <sup>11</sup>                                                          | Abdominal radiography is often requested. However, its results contribute to patient treatment in a small percentage of cases. If a patient requires investigations beyond clinical history, physical examination and laboratory studies, the physician should be encouraged to request more definitive imaging.       |
| Constipation   | North American Society for Pediatric Gastroenterology, Hepatology and Nutrition <sup>12</sup> | A thorough history and physical examination is generally sufficient to allow the practitioner to establish whether the child requires further evaluation (e.g. if fever, vomiting, bloody diarrhea, failure to thrive, anal stenosis, tight empty rectum) or has functional constipation.                              |
|                | National Institute for Health and Care Excellence <sup>13</sup>                               | Do not use a plain abdominal radiograph to make a diagnosis of idiopathic constipation. Consider a plain abdominal radiograph only if requested by specialist services in the ongoing management of intractable idiopathic constipation.                                                                               |
|                | Freedman 2014 <sup>14</sup>                                                                   | Misdiagnosis in children with constipation are more frequent in those in whom an abdominal x-ray was performed. The presence of stool on abdominal radiograph does not rule out an alternative diagnosis.                                                                                                              |
|                | Reuchlin-Vroklage 2005 <sup>15</sup>                                                          | The limited amount of data shows conflicting evidence for an association between clinical symptoms of constipation and fecal loading on abdominal radiographs in children. The recommendation to perform a plain abdominal radiograph in case of doubt of the presence of constipation in a child cannot be supported. |

## References

1. Friedman JN, Rieder MJ, Walton JM, Canadian Paediatric Society, Acute Care Committee, Drug Therapy and Hazardous Substances Committee. Bronchiolitis: Recommendations for diagnosis, monitoring and management of children one to 24 months of age. *Paediatr Child Health* 2014;19:485-98.
2. American Academy of Pediatrics, Subcommittee on Diagnosis and Management of Bronchiolitis. Clinical Practice Guidelines: The Diagnosis, management and prevention of bronchiolitis. *Pediatrics* 2014;134(5):1774-93.

3. National Institute for Health and Care Excellence. Bronchiolitis in children: diagnosis and management (NICE guideline NG9). 2015. <https://www-nice-org-uk.myaccess.library.utoronto.ca/guidance/ng9>.
4. O'Brien S, Borland ML, Cotterell E, et al., Paediatric Research in Emergency Departments International Collaborative (PREDICT) Network, Australasia. Australasian bronchiolitis guideline. *J Paediatr Child Health* 2019;55:42-53.
5. Quinonez RA, Garber MD, Schroeder AR, et al. Choosing wisely in pediatric hospital medicine: five opportunities for improved healthcare value. *J Hosp Med* 2013;8(9):479-485.
6. Choosing Wisely Australia. RACP Paediatrics & Child Health Division Recommendations. Accessed November 26th 2021 at <https://www-choosingwisely-org-au/recommendations/racp2>
7. Friedman NJ, Davis T, Somaskanthan A, Ma A. Avoid doing chest x-rays in infants with typical bronchiolitis. *BMJ* 2021;375:e064132
8. Trottier ED, Allain D, Chauvin-Kimoff L, Canadian Paediatric Society, Acute Care Committee, Paediatric Emergency Medicine Section. Managing an acute asthma exacerbation in children. *Paediatr Child Health* 2021;26(7):438-439.
9. National Asthma Education and Prevention Program. Expert Panel Report 3 (EPR-3): Guidelines for the diagnosis and management of asthma – summary report 2007. *J Allergy Clin Immunol* 2007;120(5):S94-138.
10. Global Initiative for Asthma. Global Strategy for Asthma Management and Prevention, 2021. Accessed online on December 10<sup>th</sup> 2021 from [www.ginasthma.org](http://www.ginasthma.org)
11. Kellow ZS, MacInnes M, Kurzencwyg D, et al. The role of abdominal radiography in the evaluation of the nontrauma emergency patient. *Radiology* 2008;248(3):887-93.
12. Tabbers MM, DiLorenzo C, Berger MY, et al. Clinical Practice Guideline: Evaluation and treatment of functional constipation in infants and children: evidence-based recommendations from ESPGHAN and NASPGHAN. *J Pediatr Gastroenterol, Nutr* 2014;58(2):258-74.
13. National Institute for Health and Care Excellence. Clinical Guideline: Constipation in children and young people: diagnosis and management. Accessed online on December 10th 2021 at [www.nice.org.uk/guidance/cg99](http://www.nice.org.uk/guidance/cg99)
14. Freedman SB, Thull-Freedman J, Manson D, et al. Pediatric abdominal radiograph use, constipation, and significant misdiagnoses. *J Pediatr* 2014;164(1):83-88.
15. Reuchlin-Vroklage LM, Bierma-Zeinstra S, Benninga MA, Berger MY. Diagnostic value of abdominal radiography in constipated children: a systematic review. *Arch Pediatr Adolesc Med*. Jul 2005;159(7):671-8.

**Supplemental Table 2. Data sources and associated study variables**

| <b>Data source</b>                                                                 | <b>Variables</b>                                                                             |
|------------------------------------------------------------------------------------|----------------------------------------------------------------------------------------------|
| Canadian Institute for Health Information – Discharge Abstract Database (CIHI-DAD) | Admission, ICU admission                                                                     |
| National Acute Care Reporting System (NACRS)                                       | ED discharge diagnosis, CTAS score, time and day of presentation                             |
| Ontario Health Insurance Plan (OHIP)                                               | Radiograph use, surgical procedures                                                          |
| Registered Person Database (RPDB)                                                  | Patient sex, location of residence, date of birth, date of death                             |
| ICES Physician Database (IPDB)                                                     | Physician sex, years in practice, specialty, domestic vs foreign training                    |
| Ontario Institution Database (INST)                                                | Number of patient visits, number of pediatric visits, hospital designation / academic status |
| Immigration, Refugees and Citizenship Canada's Permanent Resident Database         | Immigration status                                                                           |
| Office of the Registrar General Vital Statistics Database (ORGD)                   | Date of death                                                                                |
| ASTHMA database                                                                    | ED discharge diagnosis                                                                       |

ICU: Intensive care unit, CTAS: Canadian Triage Acuity Score, ED: Emergency Department

**Supplemental Table 3. Imaging and diagnostic codes from the Ontario Health Insurance Plan (OHIP) and International Classification of Disease 9th and 10<sup>th</sup> versions (ICD9 and ICD10) used in the study**

| <b>Imaging modality</b> | <b>OHIP diagnostic imaging codes</b>                                                                                                                             |                              |
|-------------------------|------------------------------------------------------------------------------------------------------------------------------------------------------------------|------------------------------|
| Chest radiograph        | X039, X040, X045, X047, X090, X091, X092, X096, X195, X209, X211                                                                                                 |                              |
| Abdominal radiograph    | X036, X037, X060, X100, X101, X103, X104, X108, X109, X110, X111, X113, X117, X122, X123, X129, X130, X134, X135, X137, X139, X140, X191, X197, X231, X232, X233 |                              |
| <b>Diagnosis</b>        | <b>ICD-9 codes</b>                                                                                                                                               | <b>ICD-10 codes</b>          |
| Bronchiolitis           | 4661, 46619                                                                                                                                                      | J210, J211, J218, J219       |
| Asthma                  | 493                                                                                                                                                              | J45                          |
| Abdominal pain          | 7890x                                                                                                                                                            | R100, R101, R103, R104, R193 |
| Constipation            | 5640                                                                                                                                                             | K590                         |

**Supplemental Table 4. Pediatric low-value radiograph use by hospital-type, pediatric volume, and physician specialty at Ontario emergency departments between 2010-2019, excluding patients with chronic complex conditions<sup>1</sup>**

|                                         | Bronchiolitis<br>OR (95% CI) | Asthma<br>OR (95% CI) | Abdominal pain<br>OR (95% CI) | Constipation<br>OR (95% CI) |
|-----------------------------------------|------------------------------|-----------------------|-------------------------------|-----------------------------|
| Number of observations                  | N = 57,467                   | N = 135,044           | N = 318,841                   | N = 104,695                 |
| <b>Hospital-type</b>                    |                              |                       |                               |                             |
| Pediatric academic (referent)           | 1                            | 1                     | 1                             | 1                           |
| Adult academic                          | 5.2 (4.7-5.7)                | 3.0 (2.8-3.2)         | 1.3 (1.2-1.3)                 | 1.6 (1.5-1.7)               |
| Community hospital with pediatrics      | 4.9 (4.7-5.2)                | 2.6 (2.5-3.7)         | 1.6 (1.6-1.7)                 | 2.4 (2.3-2.4)               |
| Community hospital without pediatrics   | 2.9 (2.8-3.1)                | 1.7 (1.6-1.7)         | 1.4 (1.3-1.4)                 | 1.4 (1.3-1.4)               |
| <b>Pediatric volumes</b>                |                              |                       |                               |                             |
| High (referent)                         | 1                            | 1                     | 1                             | 1                           |
| Medium                                  | 0.9 (0.8-0.9)                | 0.9 (0.9-0.9)         | 1.0 (0.9-1.0)                 | 0.9 (0.8-0.9)               |
| Low                                     | 0.7 (0.6-0.7)                | 0.6 (0.5-0.6)         | 0.5 (0.5-0.5)                 | 0.4 (0.4-0.4)               |
| <b>Physician specialty</b>              |                              |                       |                               |                             |
| Pediatric emergency medicine (referent) | 1                            | 1                     | 1                             | 1                           |
| Emergency medicine                      | 3.3 (3.0-3.7)                | 2.8 (2.6-3.0)         | 1.2 (1.2-1.3)                 | 1.7 (1.6-1.8)               |
| Family medicine + emergency medicine    | 4.9 (4.6-5.2)                | 2.8 (2.6-2.9)         | 1.6 (1.6-1.7)                 | 2.1 (2.0-2.2)               |
| Pediatrics                              | 1.7 (1.6-1.9)                | 1.7 (1.6-1.8)         | 1.0 (0.9-1.0)                 | 1.0 (1.0-1.1)               |
| Family medicine / general practice      | 3.5 (3.3-3.7)                | 2.2 (2.1-2.3)         | 1.3 (1.3-1.4)                 | 1.5 (1.4-1.6)               |
| Others <sup>2</sup>                     | 9.2 (8.1-10.5)               | 9.0 (8.1-10.0)        | 2.3 (2.2-2.5)                 | 3.5 (3.3-3.9)               |

<sup>1</sup>All models adjusted for patient age, sex, income quintile, immigrant/refugee status, complex chronic conditions, Canadian Triage Acuity Score, time of presentation, physician sex, physician years in practice, and physician training background (domestic vs international)

<sup>2</sup>Other physician specialties included critical care medicine, psychiatry, internal medicine, anesthesiology, orthopedic surgery, cardiology, nuclear medicine, otolaryngology, neonatal medicine, general surgery, and 44 others.

**Supplemental Table 5. Pediatric low-value radiograph use by hospital-type, pediatric volume, and physician specialty at Ontario emergency departments between 2010-2019, excluding return visits within 72h<sup>1</sup>**

|                                         | Bronchiolitis<br>OR (95% CI) | Asthma<br>OR (95% CI) | Abdominal pain<br>OR (95% CI) | Constipation<br>OR (95% CI) |
|-----------------------------------------|------------------------------|-----------------------|-------------------------------|-----------------------------|
| Number of observations                  | N = 57,467                   | N = 131,479           | N = 295,966                   | N = 99,980                  |
| <b>Hospital-type</b>                    |                              |                       |                               |                             |
| Pediatric academic (referent)           | 1                            | 1                     | 1                             | 1                           |
| Adult academic                          | 5.2 (4.7-5.8)                | 3.1 (2.9-3.3)         | 1.3 (1.2-1.4)                 | 1.6 (1.5-1.8)               |
| Community hospital with pediatrics      | 5.1 (4.8-5.3)                | 2.7 (2.6-2.8)         | 1.8 (1.7-1.8)                 | 2.5 (2.4-2.5)               |
| Community hospital without pediatrics   | 2.9 (2.8-3.1)                | 1.7 (1.6-1.7)         | 1.4 (1.4-1.5)                 | 1.4 (1.3-1.4)               |
| <b>Pediatric volumes</b>                |                              |                       |                               |                             |
| High (referent)                         | 1                            | 1                     | 1                             | 1                           |
| Medium                                  | 0.86 (0.81-0.91)             | 0.88 (0.85-0.91)      | 0.96 (0.94-0.99)              | 0.84 (0.81-0.87)            |
| Low                                     | 0.65 (0.58-0.73)             | 0.56 (0.52-0.59)      | 0.48 (0.46-0.51)              | 0.38 (0.35-0.41)            |
| <b>Physician specialty</b>              |                              |                       |                               |                             |
| Pediatric emergency medicine (referent) | 1                            | 1                     | 1                             | 1                           |
| Emergency medicine                      | 3.4 (3.1-3.7)                | 2.9 (2.7-3.1)         | 1.3 (1.2-1.4)                 | 1.8 (1.7-1.9)               |
| Family medicine + emergency medicine    | 5.0 (4.6-5.3)                | 2.8 (2.7-3.0)         | 1.8 (1.7-1.8)                 | 2.2 (2.1-2.3)               |
| Pediatrics                              | 1.8 (1.6-1.9)                | 1.7 (1.6-1.9)         | 1.0 (0.9-1.0)                 | 1.1 (1.0-1.1)               |
| Family medicine / general practice      | 3.6 (3.3-3.8)                | 2.2 (2.1-2.4)         | 1.4 (1.4-1.5)                 | 1.5 (1.5-1.6)               |
| Others <sup>2</sup>                     | 9.0 (7.9-10.3)               | 9.3 (8.4-10.2)        | 2.7 (2.5-2.8)                 | 3.8 (3.5-4.2)               |

<sup>1</sup>All models adjusted for patient age, sex, income quintile, immigrant/refugee status, complex chronic conditions, Canadian Triage Acuity Score, time of presentation, physician sex, physician years in practice, and physician training background (domestic vs international)

<sup>2</sup>Other physician specialties included critical care medicine, psychiatry, internal medicine, anesthesiology, orthopedic surgery, cardiology, nuclear medicine, otolaryngology, neonatal medicine, general surgery, and 44 others.

**Supplemental Table 6. Pediatric low-value radiograph use by hospital-type, pediatric volume, and physician specialty at Ontario emergency departments between 2010-2019, excluding low pediatric volume hospitals<sup>1</sup>**

|                                         | Bronchiolitis<br>OR (95% CI) | Asthma<br>OR (95% CI) | Abdominal pain<br>OR (95% CI) | Constipation<br>OR (95% CI) |
|-----------------------------------------|------------------------------|-----------------------|-------------------------------|-----------------------------|
| Number of observations                  | N = 57,098                   | N = 128,199           | N = 306,873                   | N = 101,791                 |
| <b>Hospital-type</b>                    |                              |                       |                               |                             |
| Pediatric academic (referent)           | 1                            | 1                     | 1                             | 1                           |
| Adult academic                          | 5.4 (4.8-5.9)                | 3.0 (2.8-3.2)         | 1.5 (1.4-1.6)                 | 1.9 (1.7-2.0)               |
| Community hospital with pediatrics      | 4.8 (4.6-5.1)                | 2.6 (2.5-2.7)         | 1.6 (1.6-1.7)                 | 2.3 (2.3-2.4)               |
| Community hospital without pediatrics   | 3.0 (2.9-3.2)                | 1.8 (1.7-1.9)         | 1.5 (1.4-1.5)                 | 1.6 (1.5-1.6)               |
| <b>Pediatric volumes</b>                |                              |                       |                               |                             |
| High (referent)                         | 1                            | 1                     | 1                             | 1                           |
| Medium                                  | 0.88 (0.84-0.93)             | 0.88 (0.85-0.91)      | 0.96 (0.94-0.99)              | 0.85 (0.82-0.88)            |
| <b>Physician specialty</b>              |                              |                       |                               |                             |
| Pediatric emergency medicine (referent) | 1                            | 1                     | 1                             | 1                           |
| Emergency medicine                      | 3.3 (3.0-3.7)                | 2.8 (2.6-3.0)         | 1.3 (1.3-1.4)                 | 1.8 (1.7-2.0)               |
| Family medicine + emergency medicine    | 5.0 (4.6-5.2)                | 2.7 (2.6-2.9)         | 1.6 (1.6-1.7)                 | 2.2 (2.1-2.3)               |
| Pediatrics                              | 1.7 (1.6-1.9)                | 1.7 (1.6-1.8)         | 1.0 (0.9-1.0)                 | 1.0 (1.0-1.1)               |
| Family medicine / general practice      | 3.6 (3.4-3.9)                | 2.3 (2.2-2.5)         | 1.4 (1.3-1.5)                 | 1.6 (1.6-1.7)               |
| Others <sup>2</sup>                     | 9.1 (8.0-10.3)               | 9.0 (8.1-10.0)        | 2.4 (2.2-2.5)                 | 3.6 (3.3-4.0)               |

<sup>1</sup>All models adjusted for patient age, sex, income quintile, immigrant/refugee status, complex chronic conditions, Canadian Triage Acuity Score, time of presentation, physician sex, physician years in practice, and physician training background (domestic vs international)

<sup>2</sup>Other physician specialties included critical care medicine, psychiatry, internal medicine, anesthesiology, orthopedic surgery, cardiology, nuclear medicine, otolaryngology, neonatal medicine, general surgery, and 44 others.



## **Supplemental Figure 1. Trends in low-value radiograph use by indication at Ontario emergency departments from 2010-2019**
